1 Isolation–By–Distance–and–Time in a  
2 Stepping–Stone model

3 Nicolas Duforet-Frebourg\*, Montgomery Slatkin

*Department of Integrative Biology,  
University of California Berkeley, Berkeley CA 94720*

4 **Abstract**

5 With the great advances in ancient DNA extraction, population genetics  
6 data are now made of geographically separated individuals from both present  
7 and ancient times. However, population genetics theory about the joint ef-  
8 fect of space and time has not been thoroughly studied. Based on the clas-  
9 sical stepping–stone model, we develop the theory of Isolation by Distance  
10 and Time. We derive the correlation of allele frequencies between demes  
11 in the case where ancient samples are present in the data, and investigate  
12 the impact of edge effects with forward–in–time simulations. We also derive  
13 results about coalescent times in circular/toroidal models. As one of the  
14 most common way to investigate population structure is to apply principal  
15 component analysis, we evaluate the impact of this theory on plots of prin-  
16 cipal components. Our results demonstrate that time between samples is a  
17 non-negligible factor that requires new attention in population genetics.

---

\*corresponding author: [duforetn@berkeley.edu](mailto:duforetn@berkeley.edu)

## 18 **1 Introduction**

19 Geography plays a central role in the pattern of genetic differentiation within  
20 a species. Seminal work on describing the evolution of continuous popula-  
21 tions was done by Wright and Malécot. They studied genetic differentia-  
22 tion and inbreeding in continuously distributed population (Wright, 1943;  
23 Malécot, 1948). The resulting idea is that, under the assumption of local  
24 dispersion, genetic differentiation accumulates with distance. This pattern  
25 of genetic structure is called Isolation–By–Distance (IBD), which is detected  
26 by computing measures of differentiation such as  $F_{ST}$  (Wright, 1943; Nei,  
27 1973; Weir and Cockerham, 1984), or correlation coefficients (Malécot, 1955;  
28 Kimura and Weiss, 1964). Understanding the effect of geographic distance  
29 on population structure is an important task for population geneticist, as  
30 it is a source of neutral genetic variation (Slatkin, 1985; Rousset, 1997).  
31 Furthermore, IBD has been observed in humans and many other species  
32 (Sharbel et al., 2000; Castric and Bernatchez, 2003; Ramachandran et al.,  
33 2005; Hellberg, 2009; Karakachoff et al., 2015).

34 The role of geography in neutral genetic variation has been widely stud-  
35 ied partly because of the existence of many population genetic studies of  
36 individuals living at the present time and sampled in different locations.  
37 Because of the development of methods for sequencing DNA from fossils,  
38 genomes of individuals alive at previous times are now available to bring  
39 new information about the evolutionary processes that affected a species in  
40 the past. Since the first studies of ancient DNA (aDNA) three decades ago  
41 (Higuchi et al., 1984; Pääbo, 1985), techniques to retrieve DNA molecules  
42 from ancient bones have tremendously developed (Pääbo et al., 2004).

43 In modern evolutionary biology, the similarity of differentiation in space  
44 and time is acknowledged (Depaulis et al., 2009; Andrello et al., 2011;  
45 Teacher et al., 2011). Theoretical developments predict the effect of time on  
46  $F_{ST}$  and related quantities (Skoglund et al., 2014). Epperson (2000) studied  
47 patterns of isolation by distance and time in ecology by using stochastic  
48 spatial time series and Identity by descent probabilities However such theo-  
49 retical studies remain scarce.

50 The effect of separation in time can be studied using classical statisti-  
51 cal methods in population genetics, such as principal component analysis  
52 (PCA) (Patterson et al., 2006). PCA is widely used to determine relatedness  
53 between individuals, and is a convenient way to represent geographic pat-  
54 terns (Novembre et al., 2008). But PCA can also capture the differentiation  
55 between ancient and modern samples: the percentage of variance explained  
56 by time can be expressed on the same scale as the percentage of variance

57 explained by geography (Skoglund et al., 2014). Unfortunately, PCA does  
58 not give a complete picture of how differentiation quantities such as  $F_{st}$  and  
59 correlations of allele frequencies evolve in time and space.

60 In this article we generalize the theory of IBD to allow for difference  
61 in the times at which different individuals are sampled. We call this the  
62 theory of isolation by distance and time (IBDT). We base our work on the  
63 stepping-stone model of Kimura (1953) and add to the theoretical results  
64 known for this model (Kimura and Weiss, 1964; Weiss and Kimura, 1965;  
65 Maruyama, 1971a; Nagylaki, 1983; Cox et al., 2002; De and Durrett, 2007).  
66 We start by briefly reviewing the original results for the infinite stepping-  
67 stone model at equilibrium and the decay of correlation of allele frequencies  
68 with distance. Then, we extend the original work to derive the correlation  
69 between individuals separated by distance and time. We perform simulations  
70 that show the validity of the analytic results, even in the case of a finite  
71 number of populations where some demes are subject to edge effect. We also  
72 derive the expected coalescence times between samples separated by time  
73 and space in circular and toroidal models (Slatkin, 1991, 1993). Finally we  
74 consider the consequences of IBDT on PCA in the common case of a dataset  
75 made of a large proportion genomes from present-day individuals and few  
76 ancient genomes.

## 77 2 The stepping-stone model

78 The stepping-stone model describes the distribution of allele frequencies in  
79 an infinite set of demes in different locations of the space represented by  
80 Cartesian coordinates. We start by describing the 1-Dimensional case. Let  
81  $p(k)$  be the frequency of one allele at a bi-allelic locus in population  $k$  and  
82  $\bar{p}$  be the overall allele frequency. In each generation,  $p(k)$  is updated with  
83 the following three steps (Crow et al., 1970):

- 84 • Exchange a proportion  $m_i$  of migrants with demes at a distance  $i$ .
- 85 • Exchange a proportion  $m_\infty$  of migrants with a deme that has fixed  
86 allele frequency  $\bar{p}$ . The meaning of this step is discussed later.
- 87 • Sample gametes of the next generation in the population.

88 In the case considered by Kimura and Weiss (1964), migrants are ex-  
89 changed only between neighboring locations in the first step, so that  $m_i =$   
90  $0, i > 1$ . The second step consists of exchanges of migrants with an external  
91 population at rate  $m_\infty$ . This event is equivalent to reversible mutations

92 occurring. The formulation of the model states that every locus is bi-allelic,  
 93 and the number of loci is fixed. As a consequence, the mutation model is a  
 94 reversible mutation model with probability  $m_\infty$ , and  $m_i \gg m_\infty$ . Random  
 95 sampling of step 3 is represented by a random change in the allele frequency  
 96  $\epsilon(k)$ , with  $E[\epsilon(k)] = 0$ , and  $E[\epsilon(k)^2] = p(k)(1 - p(k))/2N_e$ , where  $N_e$  is the  
 97 effective population size of a deme (Wright, 1940; Kimura and Crow, 1963).

98 Our interest is in the changes in allele frequency in one generation. We  
 99 consider  $\tilde{p}(k) = \bar{p} - p(k)$ , the deviation from the average frequency. Given  
 100 these three steps,

$$\tilde{p}'(k) = (1 - \sum_{i=1}^{\infty} m_i - m_\infty) \tilde{p}(k) + \frac{m_1}{2} (\tilde{p}(k-1) + \tilde{p}(k+1)) + \frac{m_2}{2} (\tilde{p}(k-2) + \tilde{p}(k+2)) + \dots + \epsilon(k). \quad (1)$$

101 To simplify the notation, we define the operators  $S$  and  $L$ ,

$$S\tilde{p}(k) = \tilde{p}(k+1), S^{-1}\tilde{p}(k) = \tilde{p}(k-1), \quad (2)$$

102

$$L = (1 - \sum_{i=1}^{\infty} m_i - m_\infty) S^0 + \sum_{i=1}^{\infty} \frac{m_i}{2} (S^i + S^{-i}), \quad (3)$$

103 so that,

$$\tilde{p}'(k) = L\tilde{p}(k) + \epsilon(k). \quad (4)$$

104 The quantity of interest in this model is the correlation of allele frequen-  
 105 cies between two demes at locations  $k_1$  and  $k_2$ . Let  $r(k)$  be the correlation  
 106 coefficient of allele frequencies between populations that are  $k$  steps apart.  
 107 Assuming equilibrium, we have

$$r(k) = \frac{\rho(k)}{\rho(0)} = \frac{E[\tilde{p}(k_1)\tilde{p}(k_2)]}{\rho(0)} = \frac{E[L\tilde{p}(k_1)L\tilde{p}(k_2)]}{\rho(0)}, \quad (5)$$

108 where  $\rho(k)$  is the covariance in frequencies in demes  $k$  steps apart. The  
 109 mathematical treatment of equation (5) by Weiss and Kimura (1965) using  
 110 the spectral representation of a correlation (Doob, 1953) gives the general  
 111 formula

$$r(k) = \frac{C}{2\pi} \int_0^{2\pi} \frac{\cos(k\theta)d\theta}{1 - [\sum_{i=0}^{\infty} m_i \cos(i\theta)]^2}, \quad (6)$$

112 where  $C$  is the normalizing constant.

113 Equation (6) can be approximated by an exponential function of  $k$ :

$$r(k) = e^{-\sqrt{\frac{2m_\infty}{m_1}}k}. \quad (7)$$

114 This simple formula conveys the important idea that in one dimension, the  
 115 correlation of allele frequencies between populations decays exponentially  
 116 with distance. In the 2-Dimensional and 3-Dimensional cases, the cor-  
 117 relation function is more difficult to approximate. Using modified Bessel  
 118 function, it is shown that correlation at a given distance is lower in these  
 119 cases than in the 1-Dimensional case (Weiss and Kimura, 1965).

### 120 3 Isolation-by-Distance-and-Time

#### 121 3.1 1-Dimensional case

122 We are here interested in the case where genetic samples are collected from  
 123 demes that are in different locations and at different times (measured in  
 124 generations). Let  $\rho(k, t)$  be the covariance between allele frequencies of two  
 125 demes separated by  $k$  steps and  $t$  generations. We denote the coordinates of  
 126 these demes by  $(k_1, t_1)$  and  $(k_2, t_2)$ , and the deviations in allele frequencies  
 127  $\tilde{p}(k_1)^{(t_1)}$  and  $\tilde{p}(k_2)^{(t_2)}$ . Since we assume the distribution of allele frequencies  
 128 is stationary in both time (equilibrium distribution) and space (all migration  
 129 rates are equal), we can consider these coordinates to be  $(0, 0)$  and  $(k, t)$  with  
 130 no loss of generality. Following previous notation

$$\rho(k, t) = E[\tilde{p}(k_1)^{(t_1)}\tilde{p}(k_2)^{(t_2)}] = E[\tilde{p}(k)^{(t)}\tilde{p}(0)^{(0)}]. \quad (8)$$

131 To characterize the evolution of the covariance between allele frequencies  
 132 with respect to time  $t$ , we iteratively apply the operator  $L$  defined in equation  
 133 (3). This operation describes the potential trajectories of an allele, and  
 134 results in a quantity similar to a propagator. This process leads to

$$\rho(k, t) = L^t \rho(k) \quad (9)$$

135 with  $\rho(k) = \rho(k, 0)$  (see Appendix A).

136 Let  $r(k, t)$  be the correlation between allele frequencies of two demes  
 137 separated by  $k$  steps and  $t$  generations, equations (5) and (9), combined  
 138 with the general formula of equation (6) gives

$$r(k, t) = \frac{C}{2\pi} \int_0^{2\pi} \frac{[\sum_{i=0}^{\infty} m_i \cos(i\theta)]^t \cos(k\theta) d\theta}{1 - [\sum_{i=0}^{\infty} m_i \cos(i\theta)]^2}. \quad (10)$$

139 and the constant  $C$  is set such that  $r(0, 0) = 1$  (Appendix B).

140 This equation reduces to

$$r(k, t) = \frac{C}{2\pi} \int_0^{2\pi} \frac{[1 - m_1 - m_\infty + m_1 \cos(\theta)]^t \cos(k\theta) d\theta}{1 - (1 - m_1 - m_\infty + m_1 \cos(\theta))^2} \quad (11)$$

141 in the standard stepping-stone model, where demes only exchange migrants  
142 with their closest neighbors at rate  $m_1/2$ . An exact formula for this integral  
143 can be calculated and is notable for its size and lack of utility (Appendix  
144 C).

145 One noteworthy feature of equation (10) is that the decay of the cor-  
146 relation with time is not affected by the effective population size  $N_e$ . This  
147 result is different from what is expected for an isolated population: the level  
148 of differentiation as a function of the number of generations separating two  
149 samples is larger when the effective population size is small, reflecting the  
150 increased magnitude of genetic drift. However, in the particular case of an  
151 equilibrium stepping-stone model, the covariance of allele frequencies be-  
152 tween the demes is not a function of the effective population size, a result  
153 already known in the spatial context (see equation (7)) (Kimura and Weiss,  
154 1964). This result becomes clear when considered in terms of coalescence  
155 times. Between the time the first and second samples are taken, the trajec-  
156 tory of the first sample depends only on the migration process. There is no  
157 possibility of coalescence.

### 158 3.2 Two dimensions and more.

159 So far, we have focused on the 1-Dimensional case for the sake of simplicity.  
160 However, it is important to investigate the decay in higher dimensions as it  
161 is common in practice to have samples taken from a 2-Dimensional or even  
162 3-Dimensional habitat. The general formula for the correlation in higher  
163 dimensions can be obtained with no more theoretical development. In their  
164 work on the stepping-stone model, Kimura and Weiss derived a general for-  
165 mula for the correlation that can be extended to any number of dimensions.  
166 In their work they only gave approximations for 1, 2 or 3 dimensions as these  
167 are the practical cases. Using general formula (3.11) of Weiss and Kimura  
168 (1965), we can write the correlation 10 in 2 dimensions

$$r(k_1, k_2, t) = \frac{C_2}{(2\pi)^2} \int_0^{2\pi} \int_0^{2\pi} \frac{[\sum_{i_1=0}^{\infty} \sum_{i_2=0}^{\infty} m_{i_1 i_2} \cos(i_1 \theta_1) \cos(i_2 \theta_2)]^t \cos(k_1 \theta_1) \cos(k_2 \theta_2) d\theta_1 d\theta_2}{1 - (\sum_{i_1=0}^{\infty} \sum_{i_2=0}^{\infty} m_{i_1 i_2} \cos(i_1 \theta_1) \cos(i_2 \theta_2))^2}. \quad (12)$$

169 The generalization to obtain the correlation in  $n$  dimensions is straight-  
170 forward (Appendix D).

171 We perform a numerical integration of equation (12) to investigate the  
172 decay of correlation with distance and time in one dimension and higher.  
173 Correlation decreases as a function of distance and time in 1, 2 and 3 di-  
174 mensional models (Figure 1). In addition, for equal values of the migration

175 and mutation rates the correlation decrease is much larger with respect to  
176 time and geography in higher dimension models, consistently with previous  
177 results (Maruyama, 1970a, 1971a). Numerical integration is done using the  
178 *R* package *cubature*.

### 179 **3.3 Simulations in one dimension and two dimensions.**

180 When considering realistic examples, a finite number of demes is present in  
181 the data. As a consequence, correlation patterns are affected by the prox-  
182 imity of the edge of the sampling scheme (Maruyama, 1970b). Another  
183 effect of the finite number of demes is that the overall allele frequency can  
184 drift away from the theoretical allele frequency. An alternative is to con-  
185 sider a finite, non-circular model, and to deal with edge issues independently  
186 (Felsenstein, 2015). To investigate to which extent the analytic theory de-  
187 veloped in the previous section is valid in a finite stepping-stone model with  
188 temporal sampling, we perform simulations.

189 Backward in time simulation software such as *ms* (Hudson, 2002), or  
190 *fastsimcoal* (Excoffier and Foll, 2011), are usually used to investigate IBD in  
191 a stepping-stone models (Novembre et al., 2008). Temporal sampling can  
192 be investigated in such model by simulating gene trees where lineages from  
193 isolated demes are joined to the stepping-stone demes at a chosen time in  
194 the past (Skoglund et al., 2014). Mutations are then randomly placed on the  
195 gene tree. Such a simulation is needed to understand the influence of time  
196 and distance on genetic differentiation, but does not precisely reproduce  
197 the process of the above model which assumes reversible mutation rather  
198 than the infinite site model. The infinite site model does not have a true  
199 equilibrium for any one site, only a pseudo-equilibrium.

200 We wrote a C program that performs forward in time simulations. The  
201 simulation program precisely follows the model presented in the previous  
202 section. At the initial time, the allele frequencies in all the demes are equal  
203 to the allele frequencies in the outside infinite-sized population. Then the  
204 program runs for a large number of generations until the stationary distri-  
205 bution of the allele frequencies is reached.

206 In the 1-Dimensional case, we simulate 100 demes. For the 2-Dimensional  
207 case, we simulate a total of 2500 demes on a  $50 \times 50$  grid. We assume all  
208 the demes have the same effective population size. We sample the allele  
209 frequencies at several times in the past. Correlation between demes fit very  
210 closely the theory of equations (11) and (12) provided that demes are taken  
211 sufficiently far away from the edge of the grid (Figure 2). The edge effect  
212 directly increases the correlation between demes, and is present when com-

213 paring present and ancient samples. In both 1 and 2 dimensions, the edge  
214 effect disappears in the simulations (Figure 3). As predicted by Maruyama,  
215 the edge effect is less strong with lower migration rates.

## 216 4 Coalescence times

### 217 4.1 Coalescence times in one dimension

218 Coalescence times in a stepping-stone model can be derived under some  
219 assumptions. In particular, we consider a case with migration only between  
220 neighboring demes and low mutation rate. Expected coalescence times be-  
221 tween genes that are in different demes is a function of the locations of these  
222 demes. These coalescence times are of interest because they closely related  
223 to  $F_{ST}$  and coefficients of identity-by-descent (Slatkin, 1991). Under the  
224 assumption of a circular 1-Dimensional stepping-stone model with  $n_d$  demes,  
225 two genes  $A_1$  and  $A_2$  have an expected coalescence time

$$E[T_{A_1 A_2}] = 2N_e n_d + (n_d - k) \frac{k}{2m}, \quad (13)$$

226 where  $N_e$  is the effective population size per deme,  $m$  the migration rate  
227 between neighboring demes (previously  $m_1$ ), and  $k$  is the distance between  
228 the two demes (Slatkin, 1991). Considering a circular arrangement of the  
229 demes makes the analysis simpler, as only the distance between the demes  
230 matters, and there are no edge effects. In addition it has been shown that  
231 linear/planar and circular/toroidal stepping stone models are very similar  
232 when considering population away from the edges (Maruyama, 1971a,b). To  
233 study a case similar to the infinite stepping-stone model, we assume  $n_d$  is  
234 large.

235 We extend the previous theoretical result in the case where two genes  
236 are sampled at different times. Let us assume that the sampled genes are in  
237 population  $k_1$  and  $k_2$ . The number of generations between the two sampling  
238 times is  $t = t_1 - t_2$ , and we assume, with no loss of generality, that  $t_1 = 0$   
239 and  $t_2 = t$  generations in the past. The coalescence process between these  
240 two genes can be divided in three phases. The first phase corresponds to  
241 the genealogy that traces back to the ancestor of the present gene, called  
242  $A_1^{(t)}$ , at generation  $t$ . This ancestor is in population  $k_1^{(t)}$ . The two other  
243 parts correspond to the time until the coalescence event between  $A_1^{(t)}$  and  
244  $A_2$ . They are respectively the time until the gene  $A_1^{(t)}$  and  $A_2$  are in the  
245 same deme, then the time to the common ancestor of these two genes. This



246 part has already been described, and the expectation is given in equation  
 247 (13) (Slatkin, 1991). The expected coalescence time between  $A_1$  and  $A_2$  is  
 248 then written

$$E[T_{A_1 A_2}] = t + E[T_{A_1^{(t)} A_2}]. \quad (14)$$

249 The variable  $T_{A_1^{(t)} A_2}$  is the coalescence time between a random gene in  
 250 the unknown population  $k_1^{(t)}$  and a random gene in population  $k_2$ . To rep-  
 251 resent the uncertainty about the population  $k_1^{(t)}$ , we derive the probability  
 252 distribution of the position  $k_1^{(t)}$  at time  $t$ , given position  $k_1$  at time 0. Using  
 253 this probability distribution we rewrite the expectation (14) as

$$E[T_{A_1 A_2}] = t + \sum_{x=0}^{n_d-1} E[T_{A_1^{(t)} A_2} | k_1^{(t)} = x] p(k_1^{(t)} = x). \quad (15)$$

254 To describe the probability distribution of position  $k_1^{(t)}$  at time  $t$  given  
 255 that a gene is in population  $k_1$  at time 0, we consider a random walk with  
 256 transition matrix

$$M = \begin{pmatrix} 1-m & \frac{m}{2} & 0 & \dots & 0 & \frac{m}{2} \\ \frac{m}{2} & 1-m & \frac{m}{2} & \dots & 0 & 0 \\ 0 & \frac{m}{2} & 1-m & \dots & 0 & 0 \\ \dots & & & & & \\ \frac{m}{2} & 0 & 0 & \dots & \frac{m}{2} & 1-m \end{pmatrix}. \quad (16)$$

257 Using standard results about Markov chains (Ross et al., 1996), we know  
 258 that the vector of probabilities for the position at time  $t$ ,  $P_{k_1^{(t)}}$  is expressed  
 259 such as

$$P_{k_1^{(t)}} = M^t P_{k_1} \quad (17)$$

260 with  $P_{k_1}$  is the initial probability distribution of gene  $A_1$ 's position. The  
 261 initial probability distribution is trivial and  $P_{k_1}$  is a vector of 0 with a 1  
 262 in the  $k_1^{th}$  entry. Exact formula for this matrix power can be obtained  
 263 using tridiagonal matrix properties (Al-Hassan, 2012). However we can also  
 264 express an approximation for the probability distribution of this process  
 265 at time  $t$ . This random process is symmetrical, centered in  $k_1$ , and using  
 266 classical results about Brownian motion, has a variance proportional to  $t$ .  
 267 We can approximate the probability distribution by a Normal distribution,  
 268 and

$$P(k_1^{(t)} = x | k_1) = \mathcal{N}(x; k_1, mt). \quad (18)$$

269 The accuracy of this approximation can be verified with simulations using  
 270 equation (17). The approximation is relevant for sufficiently large values  
 271 of  $t$ , depending on the migration rate. The expected coalescence time in a  
 272 1-Dimensional circle can then be written

$$E[T_{A_1 A_2}] = 2N_e n_d + t + \frac{1}{\sqrt{2\pi m t}} \int_0^{n_d-1} (n_d - |x - k_2|) \frac{|x - k_2|}{2m} e^{-\frac{(x-k_1)^2}{2mt}} dx. \quad (19)$$

273 Coalescence time between genes is an increasing function of distance  
 274 and time between demes (Figure 4). Asymptotically, when  $t$  is large, the  
 275 expected time for two genes to be in the same population can be approx-  
 276 imated by a linear function of time between the samples (Figure 4). The  
 277 right part of equation (19) is the integral of a product of a positive function  
 278 that depends only on the distance between demes and a Gaussian kernel  
 279 with variance  $mt$ . As the time gets large, relatively to  $m$ , the Gaussian ker-  
 280 nel becomes flat, and the integral is almost constant (Figure 4). In practice,  
 281 this implies that in a population at equilibrium, the geography does not  
 282 matter when the sample is very old.

## 283 4.2 Coalescence times in two dimensions

284 In the case of a 2-Dimensional habitat with  $n_{d1} \times n_{d2}$  demes, the expected  
 285 coalescence time between two genes  $A_1$  and  $A_2$  is

$$E[T_{A_1 A_2}] = N_e n_{d1} n_{d2} + \frac{S(i, j)}{2N_e m}, \quad (20)$$

286 where  $S(i, j)$  is a function of  $i$  and  $j$ , the number of demes between the two  
 287 genes. We assume in this case that the migration in each direction is the  
 288 same.

289 Using the same conditioning as in equation (14), we can derive the ex-  
 290 pectation for the coalescence time of genes  $A_1$  in population  $\mathbf{k}_1$  and  $A_2$  in  
 291 population  $\mathbf{k}_2$ ,  $t$  generations in the past. We have

$$E[T_{A_1 A_2}] = t + \sum_{x_1=0}^{n_{d1}-1} \sum_{x_2=0}^{n_{d2}-1} E[T_{A_1^{(t)} A_2} | \mathbf{k}_1^{(t)} = (x_1, x_2)] p(\mathbf{k}_1^{(t)} = (x_1, x_2)). \quad (21)$$

292 The probability distribution of the position of gene  $A_1$  at time  $t$ ,  $\mathbf{k}_1^{(t)}$   
 293 is known using the same random walk as in the 1-Dimensional case. The  
 294 distribution can be approximated by a bivariate Normal distribution with

295 mean  $\mathbf{k}_1$ , and covariance matrix  $\Sigma$ , where  $\Sigma$  is diagonal with terms  $mt/2$  in  
296 the diagonal. In the anisotropic case where migration rate would be different  
297 in the two dimensions,  $m_1$  and  $m_2$ ,  $\Sigma$  would have  $m_1t$  and  $m_2t$  as diagonal  
298 terms. The evaluation of this function for samples separated in distance and  
299 time shows a similar pattern to the 1-Dimensional case (Figure 4). However  
300 for a same migration rate, the expected times for two genes to be in the  
301 same deme in the 2-Dimensional toroidal model are smaller than in the 1-  
302 Dimensional circular model. Then, if there is the same number of demes,  
303 with same effective population sizes, e.g.  $n_d N_e = n_{d1} n_{d2} N_e$ , the expected  
304 coalescence times are smaller in the 2-Dimensional case. This result is  
305 already known when comparing samples taken at the same generation and  
306 remains true when  $t$  is positive (Slatkin, 1993).

## 307 5 Connection with PCA

308 Because there is a close connection between PCA and coalescence times  
309 (McVean, 2009), our results are relevant to using PCA to compare ancient  
310 and modern samples. PCA is a useful way to represent the main axes of  
311 variation in the data and has proven to be a powerful tool to infer genetic  
312 relationships when applied to ancient DNA data (Skoglund et al., 2012; Haak  
313 et al., 2015).

### 314 5.1 Ancient samples are shrunk towards 0.

315 In population genetics, PCA is usually performed by computing the eigen-  
316 vectors, and eigenvalues of the matrix of covariances in the genotypes of  
317 different individuals. Although there are other ways to compute princi-  
318 pal components, this one is convenient in population genetics because the  
319 number of variables is usually larger by several orders of magnitude than  
320 the number of samples. The effect of differences in the sampling times can  
321 be evaluated using the dependence of the covariance matrix described by  
322 equation (10). To illustrate, consider a 2-Dimensional even repartition of  
323  $10 \times 10$  demes, and ancient samples taken in several randomly chosen demes  
324 at  $t = 1000$  generations in the past (Figure 5A). By calculating the theo-  
325 retical covariance matrix and its first two eigenvectors, we obtain the first  
326 two principal components that reproduce geography of the demes (Novem-  
327 bre et al., 2008; Engelhardt and Stephens, 2010). Figure (5B) shows that  
328 principal components mimic the geography of the present demes, but an-  
329 cient demes are not superposed on the corresponding present-day sample

330 from the same deme. Instead, ancient samples move towards the center of  
331 the first and second principal components.

332 Using 100 demes from a 1-Dimensional simulation described above, we  
333 apply PCA to the allele frequencies at the 6000 simulated loci. To remove  
334 the edge effect, we simulate 200 demes, and consider only the 100 demes in  
335 the center. We also include allele frequencies from past generations for sev-  
336 eral demes. PC1 shows the 1-Dimensional pattern of isolation-by-distance  
337 as expected, and ancient samples are closer to 0 (Figure 6A). The distance  
338 between the scores of ancient individuals and the center of the principal com-  
339 ponent decreases as the sampling time increases. In practice, the true allele  
340 frequencies are not known, and the covariance matrix is estimated on indi-  
341 viduals. When working with sampled individuals instead of allele frequency,  
342 the same pattern is still visible. A subsampling of 10 diploid individuals  
343 for each deme at the present time, and 1 diploid individual for each ancient  
344 deme shows the same shrinkage of PC scores for ancient individuals (Figure  
345 6B).

346 When applying PCA on allele frequencies from the 2-Dimensional sim-  
347 ulations, the time effect is visible on the first two components. We study  
348 the case of a  $10 \times 10$  grid, with no edge effects, and ancient samples taken  
349 from 4 demes at different times in the past (Figure 6C). The first and sec-  
350 ond principal components reproduce the geography of the samples, and the  
351 ancient samples are moved towards the center of the plot (Figure 6D).

352 This shrinkage effect of time can be understood considering the shape of  
353 the covariance function. The first and second principal components repre-  
354 sent the 2-Dimensional Isolation-By-Distance pattern. This pattern causes  
355 the covariance matrix at time  $t = 0$  to have a "block Toeplitz with Toeplitz  
356 blocks" form (Novembre and Stephens, 2008). However the pairwise co-  
357 variance between present-day individuals ( $t = 0$ ) and between ancient and  
358 present-day individuals ( $t > 0$ ) does not have the same shape (Figure 1).  
359 Equation (10) implies that in a stepping-stone model the covariance as a  
360 function of distance flattens when comparing present and ancient individu-  
361 als. As a consequence, the scores of ancient samples are moved towards the  
362 center of the principal components reproducing the local correlation pattern.  
363 Thus ancient samples can cluster with present samples at different locations,  
364 even in an equilibrium stepping-stone model.

## 365 5.2 One component for the time differentiation

366 Links between PCA and population genetics quantities, such as coalescence  
367 times and  $F_{ST}$  have been studied (McVean, 2009; Duforet-Frebourg et al.,

2015; Baran and Halperin, 2015) and show that these values can be estimated from principal components. In the 2–population case, McVean (2009) showed that the distance between individuals on the appropriate principal component is approximately a linear function of the square root of the time,  $\Delta$ , until the lineages of the two individuals are in the same deme. If there are ancient and present samples, they can be considered as two groups, and  $\Delta$  is the time corresponding to the first two parts of the coalescence process between the lineages, described in the previous section. The time separating the individuals is a source of variance important enough to be reflected in the principal components (Skoglund et al., 2014). In this case, one component separates the two groups and the distance between groups is approximately proportional to  $\sqrt{\Delta}$ . In Appendix E, we compute the expectation of  $\Delta$  if there are several present-day and one ancient individuals sampled.

We analyze the case with 50 contiguous populations sampled from a circular 1-Dimensional stepping–stone model with  $n_d = 1000$ . We assume  $m_1 = 0.1$ , and one deme is sampled in the past. We apply PCA by computing the eigenvectors of the individuals correlation matrix. The first principal component represents the IBD pattern between the present demes (Figure 7A). The second principal component corresponds to the differentiation between the ancient deme, and the present demes. The average distance on PC2 between the two groups (present and ancient) is an increasing function that can be approximated by a linear function of the square root of  $\Delta$  (Figure 7B).

## 6 Conclusions and discussion

We have generalized the Kimura–Weiss theory of a stepping–stone model to the case where samples are taken at different times, a theory we call Isolation-by distance-and-time (IBDT). The correlation between individuals decreases as a function of both geographic distance and time. This result is accentuated in higher dimensions. When considering IBDT patterns, the edge effect applies when considering a linear model with a finite number of demes, similarly to the standard stepping–stone model. However simulations shows that in both 1 and 2 dimensions, this effect vanishes at a rate depending of the migration rate. We have also derived the expected coalescence times under the assumption of a circular, or toroidal model and low mutation rate. As the time between samples increases, the coalescence time between samples can be approximated by a linear function of time.

The connection between IBDT theory and PCA is of interest as it gives

405 insights about what to expect from the PC plots that compare ancient and  
406 present-day samples. When considering only principal components repro-  
407 ducing geography, scores of the ancient samples may not cluster with the  
408 population at the same location. Such a result can occur even in the case  
409 of a population at equilibrium in a stepping-stone model, with no complex  
410 demographic history. This behavior of PCA is important to note as it could  
411 result in the inference of a non-existent ancient demographic event. The  
412 genetic differentiation created by time can be observed on another principal  
413 component. An important question that remains is in which conditions the  
414 proportion of variance explained by time is larger than the proportion of  
415 variance explained by Geography. In this unlikely event, the first principal  
416 component would not reproduce geography of the samples but rather the  
417 time line of the samples.

418 The limitations of PCA to investigate population structure in a spatio-  
419 temporal context highlights the need for new theoretical developments to  
420 analyze population structure when present-day and ancient samples are  
421 combined. This is especially apparent when considering the complex de-  
422 mographic scenarios already inferred about the history of modern humans  
423 (Pickrell and Reich, 2014). Important theoretical work has already been  
424 done to test specific hypothesis (Durand et al., 2011; Loh et al., 2013). An-  
425 other way to test different past demographic events is with intensive simu-  
426 lation procedures, such as Approximate Bayesian Computations (Beaumont  
427 et al., 2002; Csilléry et al., 2010). In this case, theoretical developments  
428 on mechanistic models such as the stepping-stone model are important to  
429 perform simulations efficiently (Baird and Santos, 2010).

430 We studied the classical stepping-stone model under the assumptions of  
431 a stationary distribution of the allele frequencies in both time and space.  
432 These assumptions are not valid in all cases. The time-stationary distribu-  
433 tion is not reached when recent events such as range expansions occurred,  
434 causing asymmetry in the site frequency spectrum (Hallatschek et al., 2007;  
435 Peter and Slatkin, 2013). Spatial non-stationarity and anisotropy can occur  
436 when migration pattern is uneven between all populations, or migration is  
437 favored in one direction (Jay et al., 2013; Duforet-Frebourg and Blum, 2014;  
438 Petkova et al., 2014). The correlation of allele frequencies is then not only  
439 a function of space and time, but also of the locations of each deme in the  
440 habitat.

441 A stepping-stone model is not the only model to describe spatial popula-  
442 tion structure. As an alternative to discrete models, continuous models can  
443 also be considered to study evolutionary processes (Maruyama, 1972; Bar-  
444 ton et al., 2002, 2010). Isolation-by-Distance-and-Time can be studied in a

445 continuous framework. In the same way, results about coalescence times in  
446 a stepping-stone model can be connected to previous theory on coalescence  
447 in a continuous population (Wilkins and Wakeley, 2002).

## 448 **Acknowledgement**

449 This work was supported by NIH grant R01-6M40282 to M. Slatkin.

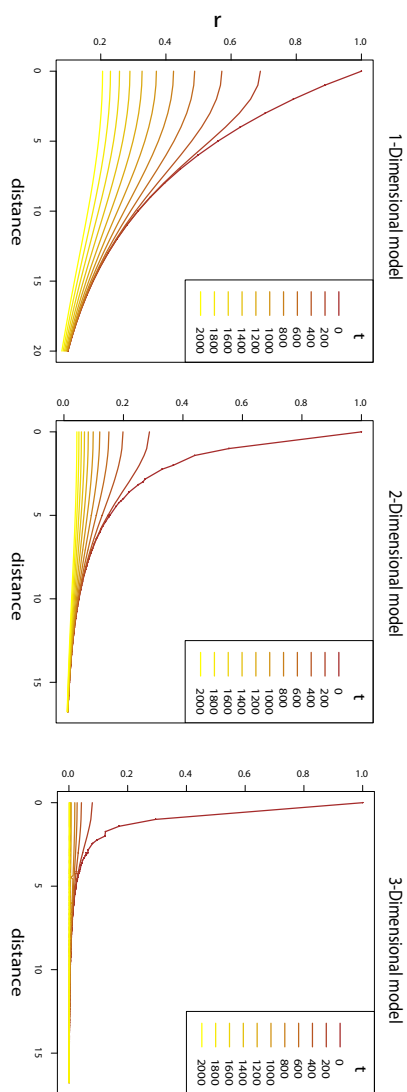

Figure 1: Correlation as a function of distance between demes  $k$  steps apart in 1, 2 and 3-Dimensional models. The correlation is evaluated for different number of generations  $t$  between the demes. The migration and mutation rates are used for all models, and  $m_1 = .01$  and  $m_\infty = 4.10^{-4}$ .



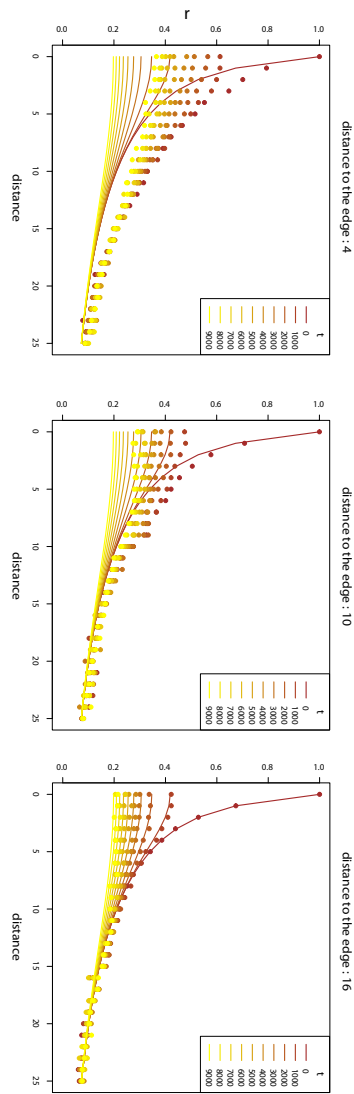

Figure 2: Comparison between theoretical results and simulations in the 2 dimensional case with  $m_1 = .02$  and  $m_\infty = 10^{-5}$ . The solid lines represent the theory prediction. The dots represent the simulation results evaluated for demes at a distance 4, 10 or 16 from the edges. Since in the simulations several pairwise comparisons between demes have the same distance in space and time, we keep the median of these pairwise correlations.

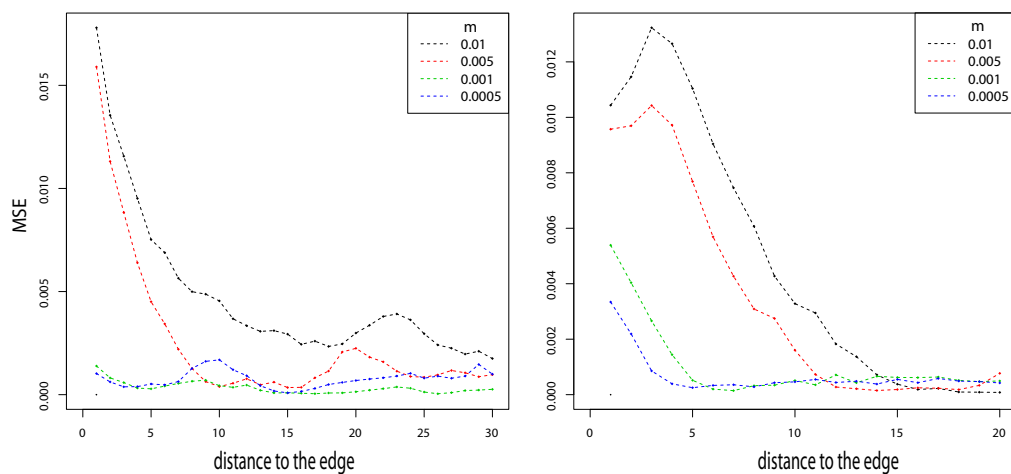

Figure 3: Mean squared error between simulations and theory in 1 and 2 Dimensions as a function of the distance to the edge. The error is evaluated for  $m_\infty = 10^{-5}$  and  $m_1 = .01, .005, .001, .0005$ .

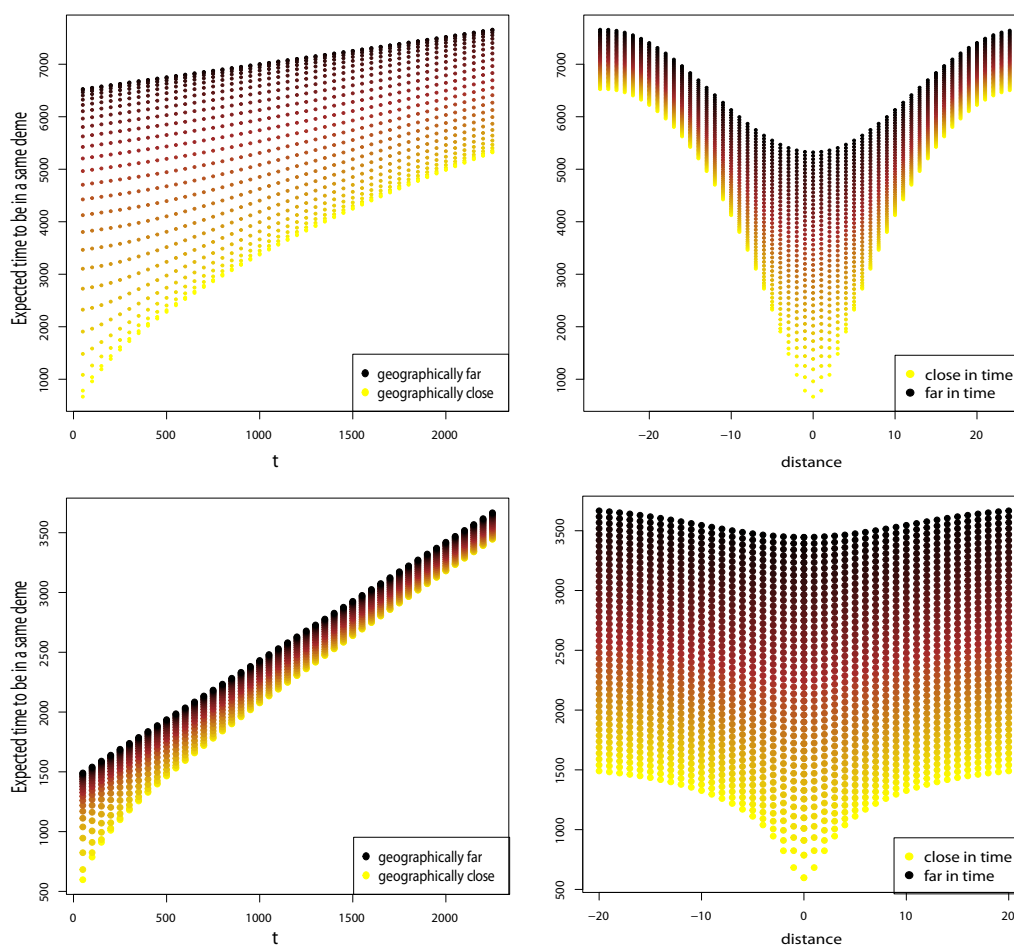

Figure 4: Top row: Expected time for two genes to be in a same deme in a 1-Dimensional circular stepping-stone model with  $N_e = 100$ ,  $m = .01$ , and  $n_d = 51$  demes. Bottom row: Expected time for two genes to be in a same deme in a 2-Dimensional toroidal stepping-stone model with  $N_e = 100$ ,  $m = .01$ , and  $n_d = 51 \times 51$  demes. Left column: Expected times as a function of the time between the samples. Colors indicate the geographic distance between samples. Right column. Expected times as a function of geographic distance between the samples. Colors indicate the time between samples. Sampling consists in 45 time points evenly separated by 50 generations.

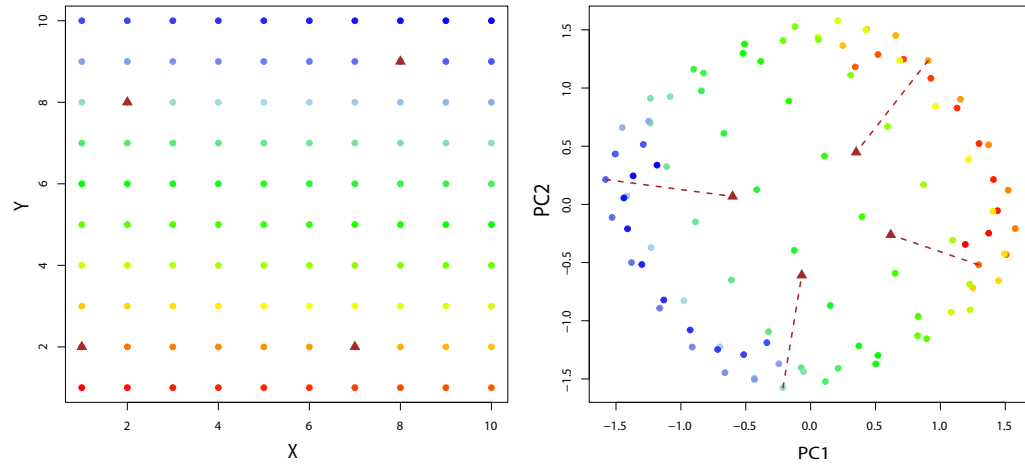

Figure 5: Panel A. Sampling scheme of a  $10 \times 10$  grid of demes. Brown triangles represent demes where ancient individuals are sampled 1000 generations in the past. Panel B. First 2 eigenvectors of the covariance matrix between populations of Panel A. Parameters used are  $m_1 = .01$  and  $m_\infty = 10^{-5}$ . Color code is the same as in Panel A. Brown arrows start from the position of the present deme where an ancient sample is taken, and end where the ancient sample is projected on the principal components.

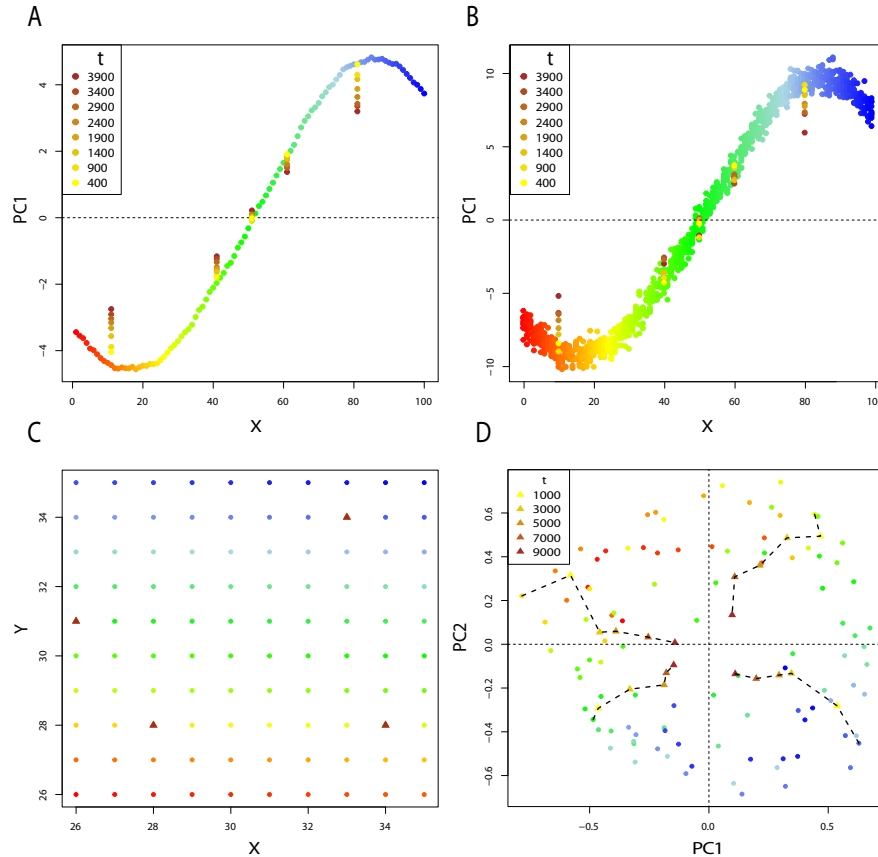

Figure 6: Panel A. First principal component for the 1-Dimensional simulation described above, with  $m_1 = .01$  and  $m_\infty = 4.10^{-5}$ . PCA is performed on allele frequency data from each of the 100 demes, and ancient allele frequencies are taken in 5 populations at 8 times in the past. Panel B. First principal component for the 1-Dimensional simulation described above. In each deme, 10 diploid individuals are sampled at the present time. One diploid individual is sampled in 5 demes at 8 times in the past. Panel C. Sampling scheme of a  $10 \times 10$  grid of populations. Demes marked by a triangle are demes where ancient individuals were sampled. Panel D. plot of  $PC1$  and  $PC2$  for the 2-Dimensional simulation with  $m_1 = .001$  and  $m_\infty = 10^{-5}$ . Ancient samples are taken at different times in the past for 4 demes.

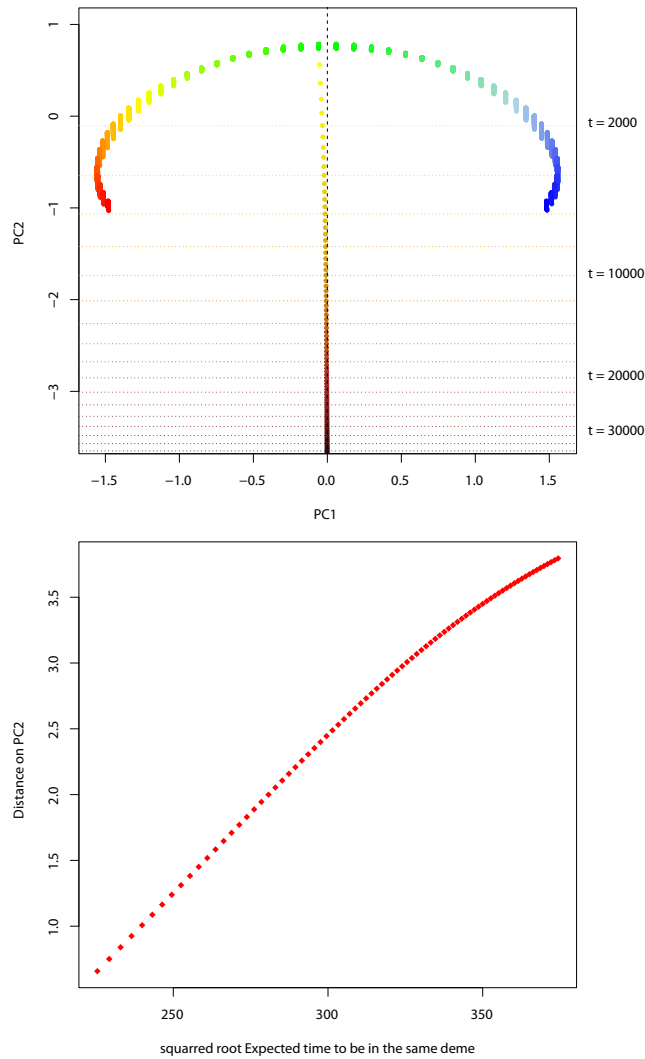

Figure 7: Panel A. Principal components for a 1-Dimensional stepping-stone with 50 present demes, and 1 ancient deme. The PCA is performed several times, with an ancient deme sampled at different times. Panel B. Average distance between present demes and ancient deme on  $PC2$  as a function of  $\sqrt{\Delta}$

## 450 Appendix A

451 Using the notations in Weiss and Kimura (1965), we calculate the covariance  
 452 of the allele frequencies  $\rho(k)$  between two populations that are spatially  
 453 separated by  $k$  units of distance. This quantity is defined by

$$\rho(k) = E[\tilde{p}(0)\tilde{p}(k)]. \quad (22)$$

454 In the case where the demes are also separated by  $t$  units of time, we define

$$\rho(k, t) = E[\tilde{p}(0)^{(0)}\tilde{p}(k)^{(t)}]. \quad (23)$$

455 and in the particular case of  $t = 1$ ,

456

$$\begin{aligned} \rho(k, 1) &= E[\tilde{p}(k)^{(1)}\tilde{p}(0)^{(0)}] \\ &= E[\tilde{p}(k)'\tilde{p}(0)] \\ &= E[(L\tilde{p}(k) + \epsilon(k))\tilde{p}(0)] \\ 457 &= E[L\tilde{p}(k)\tilde{p}(0)] + E[L\epsilon(k)\tilde{p}(0)] \\ &= LE[\tilde{p}(k)\tilde{p}(0)] \\ &= L\rho(k). \end{aligned}$$

458 By induction, we show that for any value of  $t > 0$

$$\rho(k, t) = L^t \rho(k). \quad (24)$$

459 Let's assume that for a time  $t > 0$  equation (24) is true,

$$\begin{aligned} \rho(k, t+1) &= E[\tilde{p}(k)^{(t+1)}\tilde{p}(0)^{(0)}] \\ &= E[(L\tilde{p}(k)^{(t)} + \epsilon(k)^{(t)})\tilde{p}(0)] \\ &= E[L\tilde{p}(k)^{(t)}\tilde{p}(0)] + E[L\epsilon(k)^{(t)}\tilde{p}(0)] \\ 460 &= LE[\tilde{p}(k)^{(t)}\tilde{p}(0)] \\ &= L\rho(k, t) \\ &= L^t \rho(k). \end{aligned}$$

461 Then to obtain the correlation of allele frequencies  $r(k, t)$  between two  
 462 demes, we have  $\rho(0, 0) = \rho(0)$  and

$$r(k, t) = \frac{\rho(k, t)}{\rho(0, 0)} = \frac{L^t \rho(k)}{\rho(0)} = L^t r(k). \quad (25)$$

## 463 Appendix B

464 We established in equation (11) that  $r(k, t) = L^t r(k)$ , and using the general  
465 expression in equation (6) we have,

$$466 \quad r(k, t) = L^t \frac{C}{2\pi} \int_0^{2\pi} \frac{\cos(k\theta)d\theta}{1 - [\sum_{i=0}^{\infty} m_i \cos(i\theta)]^2}$$

$$467 \quad = \frac{C}{2\pi} \int_0^{2\pi} \frac{L^t \cos(k\theta)d\theta}{1 - [\sum_{i=0}^{\infty} m_i \cos(i\theta)]^2}.$$

468 It is now demonstrated that

$$L^t \cos(k\theta) = \left[ \sum_{i=0}^{\infty} m_i \cos(i\theta) \right]^t \cos(k\theta), \quad (26)$$

469 where for the convenience of the notation we denote  $m_0 = (1 - m_\infty -$   
470  $\sum_{i=1}^{\infty} m_i)$ . In the particular case of  $t = 1$  we have

$$L \cos(k\theta) = \sum_{i=0}^{\infty} \frac{m_i}{2} (S^{+i} \cos(k\theta) + S^{-i} \cos(k\theta))$$

$$471 \quad = \sum_{i=0}^{\infty} \frac{m_i}{2} (\cos((k+i)\theta) + \cos((k-i)\theta))$$

$$= \sum_{i=0}^{\infty} \frac{m_i}{2} (2\cos(i\theta)\cos(k\theta))$$

$$= [\sum_{i=0}^{\infty} m_i \cos(i\theta)] \cos(k\theta)$$

472 Now assuming that formula (26) holds for any value  $t > 0$ , we have

$$473 \quad L^{t+1} \cos(k\theta) = L[L^t \cos(k\theta)]$$

$$= L[\sum_{i_1=0}^{\infty} \cdots \sum_{i_t=0}^{\infty} m_{i_1} \cdots m_{i_t} \cos(i_1\theta) \cdots \cos(i_t\theta)] \cos(k\theta)$$

$$474 \quad = \sum_{i_{t+1}=0}^{\infty} [\sum_{i_1=0}^{\infty} \cdots \sum_{i_t=0}^{\infty} m_{i_1} \cdots m_{i_t} \cos(i_1\theta) \cdots \cos(i_t\theta)]$$

$$\times \frac{m_{i_{t+1}}}{2} (\cos((k+i_{t+1})\theta) + \cos((k-i_{t+1})\theta))$$

$$= \sum_{i_{t+1}=0}^{\infty} \sum_{i_1=0}^{\infty} \cdots \sum_{i_t=0}^{\infty} m_{i_1} \cdots m_{i_t} m_{i_{t+1}} \cos(i_1\theta) \cdots \cos(i_t\theta) \cos(i_{t+1}\theta) \cos(k\theta)$$

$$= [\sum_{i=0}^{\infty} m_i \cos(i\theta)]^{t+1} \cos(k\theta).$$

475 We can conclude by induction that formula (26) is true for any positive  $t$ .

476 Then, using equation (26), a general formula for  $r(k, t)$  can be expressed

$$r(k, t) = \frac{C}{2\pi} \int_0^{2\pi} \frac{[\sum_{i=0}^{\infty} m_i \cos(i\theta)]^t \cos(k\theta) d\theta}{1 - [\sum_{i=0}^{\infty} m_i \cos(i\theta)]^2}. \quad (27)$$

477 Constant C is set such that  $r(0, 0) = 1$ . We do not analytically inves-  
478 tigate this constant, however details about the case  $t = 0$  can be found in  
479 Weiss and Kimura (1965).



## 480 Appendix C

Let's assume the particular stepping-stone model:  $\sum_{i=0}^{\infty} m_i \cos(i\theta) = 1 - m_1 - m_{\infty} + m_1 \cos(\theta)$ . Now the correlation between 2 demes  $k$  steps apart and  $t$  generations is

$$r(k, t) = \frac{C}{2\pi} \int_0^{2\pi} \frac{[1 - m_1 - m_{\infty} + m_1 \cos(\theta)]^t \cos(k\theta) d\theta}{1 - [1 - m_1 - m_{\infty} + m_1 \cos(\theta)]^2}.$$

The fraction can be decomposed in two parts  $r(k, t) = C/(2\pi)(A_1(k, t) + A_2(k, t))$  using partial fraction expansion, where

$$A_1(k, t) = \int_0^{2\pi} \frac{[1 - m_1 - m_{\infty} + m_1 \cos(\theta)]^t \cos(k\theta) d\theta}{1 - [1 - m_1 - m_{\infty} + m_1 \cos(\theta)]}$$

$$A_2(k, t) = \int_0^{2\pi} \frac{[1 - m_1 - m_{\infty} + m_1 \cos(\theta)]^t \cos(k\theta) d\theta}{1 + [1 - m_1 - m_{\infty} + m_1 \cos(\theta)]}$$

. Let  $\alpha = (1 - m_1 - m_{\infty})/m_1$ , we can expand  $A_1$  and  $A_2$ ,

$$A_1(k, t) = -m_1^{t-1} \sum_{i=0}^t \binom{t}{i} \alpha^{t-i} \int_0^{2\pi} \frac{\cos(\theta)^i \cos(k\theta) d\theta}{\alpha - \frac{1}{m_1} + \cos(\theta)},$$

$$A_2(k, t) = m_1^{t-1} \sum_{i=0}^t \binom{t}{i} \alpha^{t-i} \int_0^{2\pi} \frac{\cos(\theta)^i \cos(k\theta) d\theta}{\alpha + \frac{1}{m_1} + \cos(\theta)},$$

To get rid of the integral, we can use the fact that

$$\int_0^{2\pi} \frac{\cos^t(\theta) \cos(k\theta) d\theta}{x + \cos(\theta)} = \frac{1}{2^t} \sum_{i=0}^t a_i^{(t)} \int_0^{2\pi} \frac{\cos((k+i)\theta) + \cos((k-i)\theta) d\theta}{x + \cos(\theta)},$$

481 where

| $i$             | 0 | 1  | 2 | 3 | 4 | 5 | Sum                    |
|-----------------|---|----|---|---|---|---|------------------------|
| $a_i^{(1)}$     | 0 | 1  |   |   |   |   | $2 \times 1 = 2$       |
| $a_i^{(2)}$     | 2 | 0  | 1 |   |   |   | $2 \times 1 + 2 = 4$   |
| 482 $a_i^{(3)}$ | 0 | 3  | 0 | 1 |   |   | $2 \times (1 + 3) = 8$ |
| $a_i^{(4)}$     | 6 | 0  | 4 | 0 | 1 |   | 16                     |
| $a_i^{(5)}$     | 0 | 10 | 0 | 5 | 0 | 1 | 32                     |

483 and as given in Weiss and Kimura (1965)

$$\frac{1}{2\pi} \int_0^{2\pi} \frac{\cos(k\theta)d\theta}{x+\cos(\theta)} = \begin{cases} \frac{1}{\sqrt{x^2-1}}(\sqrt{x^2-1}-x)^n, & x > 1, \\ \frac{(-1)^{n+1}}{\sqrt{x^2-1}}(\sqrt{x^2-1}+x)^n, & x < -1. \end{cases}$$

This leads us to the expressions for  $A_1$  and  $A_2$ ,

$$A_1(k, t) = -m_1^{t-1} \sum_{i=0}^t \binom{t}{i} \alpha^{t-i} \frac{1}{2^i} \sum_{j=1}^i \left\{ a_j^{(i)} \frac{(-1)^{k+j}}{\sqrt{(\alpha - \frac{1}{m_1})^2 - 1}} (\alpha - \frac{1}{m_1} + \sqrt{(\alpha - \frac{1}{m_1})^2 - 1})^{k+j} \right. \\ \left. a_j^{(i)} \frac{(-1)^{k-j}}{\sqrt{(\alpha - \frac{1}{m_1})^2 - 1}} (\alpha - \frac{1}{m_1} + \sqrt{(\alpha - \frac{1}{m_1})^2 - 1})^{k-j} \right\}$$

$$A_2(k, t) = m_1^{t-1} \sum_{i=0}^t \binom{t}{i} \alpha^{t-i} \frac{1}{2^i} \sum_{j=1}^i \left\{ a_j^{(i)} \frac{1}{\sqrt{(\alpha + \frac{1}{m_1})^2 - 1}} (\sqrt{(\alpha + \frac{1}{m_1})^2 - 1} - (\alpha + \frac{1}{m_1}))^{k+j} \right. \\ \left. a_j^{(i)} \frac{1}{\sqrt{(\alpha + \frac{1}{m_1})^2 - 1}} (\sqrt{(\alpha + \frac{1}{m_1})^2 - 1} - (\alpha + \frac{1}{m_1}))^{k-j} \right\}$$

## 489 Appendix D

The 2-Dimensional case of the analysis can be detailed by changing the operators  $L$  and  $S$ . We note the cartesian coordinates of each deme with the couple  $(i_1, i_2)$ , and we define the operators  $S_1$  and  $S_2$  such as

$$S_1\tilde{p}(i_1, i_2) = \tilde{p}(i_1 + 1, i_2) \text{ and } S_2\tilde{p}(i_1, i_2) = \tilde{p}(i_1, i_2 + 1).$$

The operator  $L$  in two dimensions becomes

$$L = (1 - \sum_{i_1} \sum_{i_2} m_{i_1 i_2} - m_\infty) \frac{(S_1^0 + S_2^0)}{2} + \sum_{i_1} \sum_{i_2} \frac{m_{i_1 i_2}}{4} (S_1^{i_1} + S_1^{-i_1})(S_2^{i_2} + S_2^{-i_2})$$

where  $m_{i_1 i_2}$  is the migration rate between demes separated by  $i_1$  and  $i_2$  steps. The correlation in 2 dimensions can be written using the spectral decomposition and for two demes we have

$$r(k_1, k_2, 0) = \frac{C_2}{(2\pi)^2} \int_0^{2\pi} \int_0^{2\pi} \frac{\cos(k_1\theta_1)\cos(k_2\theta_2)d\theta_1d\theta_2}{1 - (\sum_{i_1, i_2=0}^{\infty} m_{i_1 i_2} \cos(i_1\theta_1)\cos(i_2\theta_2))^2}$$

for two populations that are separated by  $k_1$  and  $k_2$  steps at the same generation. Using the same trigonometric properties as in appendix B, we have

$$L^t \cos(k_1\theta_1)\cos(k_2\theta_2) = [\sum_{i_1} \sum_{i_2} (m_{i_1 i_2} \cos(i_1\theta_1)\cos(i_2\theta_2))]^t \cos(k_1\theta_1)\cos(k_2\theta_2)$$

and  $m_{00} = (1 - \sum_{i_1} \sum_{i_2} m_{i_1 i_2} - m_\infty)$ . As a consequence, the correlation of allele frequencies in 2 dimensions between two populations separated by  $k_1$  and  $k_2$  steps, and  $t$  generations is

$$r(k_1, k_2, t) = \frac{C_2}{(2\pi)^2} \int_0^{2\pi} \int_0^{2\pi} \frac{[\sum_{i_1=0}^{\infty} \sum_{i_2=0}^{\infty} m_{i_1 i_2} \cos(i_1\theta_1)\cos(i_2\theta_2)]^t \cos(k_1\theta_1)\cos(k_2\theta_2)d\theta_1d\theta_2}{1 - (\sum_{i_1=0}^{\infty} \sum_{i_2=0}^{\infty} m_{i_1 i_2} \cos(i_1\theta_1)\cos(i_2\theta_2))^2}.$$

To go further, and especially investigate the 3-Dimensional case that can be relevant in practice, it is possible to extend the calculations in  $n$ -dimensional models, where two populations are separated by  $t$  generations and a vector of steps  $(k_1, \dots, k_n)$ . Redefining the operators  $S$  and  $L$ , we can show that the correlation is

$$r(k_1, \dots, k_n, t) = \frac{C_n}{(2\pi)^n} \int_0^{2\pi} \dots \int_0^{2\pi} \frac{[\sum_{i_1, \dots, i_n=0}^{\infty} m_{i_1 \dots i_n} \cos(i_1\theta_1) \dots \cos(i_n\theta_n)]^t \cos(k_1\theta_1) \dots \cos(k_n\theta_n)d\theta_1 \dots d\theta_n}{1 - (\sum_{i_1, \dots, i_n=0}^{\infty} m_{i_1 \dots i_n} \cos(i_1\theta_1) \dots \cos(i_n\theta_n))^2}$$

## 490 Appendix E

491 We detail the case where two groups are present in the data, the present  
492 demes and the ancient deme. The quantity  $\Delta$  is the time for two genes in  
493 different groups to be in the same group. In the case where there is one  
494 ancient deme  $k_2$  and one present deme  $k_1$ , using equation (19) we have

$$\begin{aligned} E[\Delta|k_1] &= E[T_{A_1A_2}] - 2N_e n_d \\ 495 &= t + \frac{1}{\sqrt{2\pi m_1 t}} \int_0^{n_d} (n_d - |x - k_2|) \frac{|x - k_2|}{2m_1} e^{-\frac{(x - k_1)^2}{2m_1 t}} dx. \end{aligned}$$

496 In the practical case we consider several present time demes  $1 \dots n_p$ ,  
497 and one ancient deme. The expectation of  $\Delta$  has to be conditioned by the  
498 probability that  $A_1$  is in a given present population  $k_1$ .

$$E[\Delta] = \sum_{i=1}^{n_p} p(k_1 = j) E[\Delta|k_1 = j]. \quad (28)$$

499 Since we consider a stepping-stone model where all the populations have  
500 the same effective population size, we have  $p(k_1 = j) = 1/n_p, j = 1 \dots n_p$ .

## 501 References

- 502 Al-Hassan, Q. (2012). On powers of tridiagonal matrices with nonnegative  
503 entries. *Journal of Applied Mathematical Sciences*, 6(48):2357–2368.
- 504 Andrello, M., Bevacqua, D., Maes, G. E., and De Leo, G. A. (2011). An  
505 integrated genetic-demographic model to unravel the origin of genetic  
506 structure in european eel (*anguilla anguilla* l.). *Evolutionary applications*,  
507 4(4):517–533.
- 508 Baird, S. J. and Santos, F. (2010). Monte carlo integration over stepping  
509 stone models for spatial genetic inference using approximate bayesian com-  
510 putation. *Molecular ecology resources*, 10(5):873–885.
- 511 Baran, Y. and Halperin, E. (2015). A note on the relations between spatio-  
512 genetic models. *Journal of Computational Biology*.
- 513 Barton, N. H., Depaulis, F., and Etheridge, A. M. (2002). Neutral evolu-  
514 tion in spatially continuous populations. *Theoretical population biology*,  
515 61(1):31–48.
- 516 Barton, N. H., Etheridge, A. M., and Véber, A. (2010). A new model for  
517 evolution in a spatial continuum. *Electron. J. Probab*, 15(7).
- 518 Beaumont, M. A., Zhang, W., and Balding, D. J. (2002). Approximate  
519 bayesian computation in population genetics. *Genetics*, 162(4):2025–2035.
- 520 Castric, V. and Bernatchez, L. (2003). The rise and fall of isolation by  
521 distance in the anadromous brook charr (*salvelinus fontinalis mitchill*).  
522 *Genetics*, 163(3):983–996.
- 523 Cox, J. T., Durrett, R., et al. (2002). The stepping stone model: New  
524 formulas expose old myths. *The Annals of Applied Probability*, 12(4):1348–  
525 1377.
- 526 Crow, J. F., Kimura, M., et al. (1970). An introduction to population  
527 genetics theory. *An introduction to population genetics theory*.
- 528 Csilléry, K., Blum, M. G., Gaggiotti, O. E., and François, O. (2010). Ap-  
529 proximate bayesian computation (abc) in practice. *Trends in ecology &  
530 evolution*, 25(7):410–418.
- 531 De, A. and Durrett, R. (2007). Stepping-stone spatial structure causes slow  
532 decay of linkage disequilibrium and shifts the site frequency spectrum.  
533 *Genetics*, 176(2):969–981.

- 534 Depaulis, F., Orlando, L., and Hänni, C. (2009). Using classical population  
535 genetics tools with heterochroneous data: time matters! *PLoS One*,  
536 4(5):e5541.
- 537 Doob, J. L. (1953). *Stochastic processes*, volume 101. New York Wiley.
- 538 Duforet-Frebourg, N. and Blum, M. G. (2014). Nonstationary patterns of  
539 isolation-by-distance: inferring measures of local genetic differentiation  
540 with bayesian kriging. *Evolution*, 68(4):1110–1123.
- 541 Duforet-Frebourg, N., Laval, G., Bazin, E., and Blum, M. G. (2015). De-  
542 tecting genomic signatures of natural selection with principal compo-  
543 nent analysis: application to the 1000 genomes data. *arXiv preprint*  
544 *arXiv:1504.04543*.
- 545 Durand, E. Y., Patterson, N., Reich, D., and Slatkin, M. (2011). Testing for  
546 ancient admixture between closely related populations. *Molecular biology*  
547 *and evolution*, 28(8):2239–2252.
- 548 Engelhardt, B. E. and Stephens, M. (2010). Analysis of population structure:  
549 a unifying framework and novel methods based on sparse factor analysis.  
550 *PLoS Genet*, 6(9):e1001117.
- 551 Epperson, B. K. (2000). Spatial and space-time correlations in ecological  
552 models. *Ecological modelling*, 132(1):63–76.
- 553 Excoffier, L. and Foll, M. (2011). Fastsimcoal: a continuous-time coalescent  
554 simulator of genomic diversity under arbitrarily complex evolutionary sce-  
555 narios. *Bioinformatics*, 27(9):1332–1334.
- 556 Felsenstein, J. (2015). Covariation of gene frequencies in a stepping-stone  
557 lattice of populations. *Theoretical population biology*, 100:88–97.
- 558 Haak, W., Lazaridis, I., Patterson, N., Rohland, N., Mallick, S., Llamas, B.,  
559 Brandt, G., Nordenfelt, S., Harney, E., Stewardson, K., et al. (2015). Mas-  
560 sive migration from the steppe was a source for indo-european languages  
561 in europe. *Nature*.
- 562 Hallatschek, O., Hersen, P., Ramanathan, S., and Nelson, D. R. (2007). Ge-  
563 netic drift at expanding frontiers promotes gene segregation. *Proceedings*  
564 *of the National Academy of Sciences*, 104(50):19926–19930.
- 565 Hellberg, M. E. (2009). Gene flow and isolation among populations of marine  
566 animals. *Ecology, Evolution, and Systematic*.

- 567 Higuchi, R., Bowman, B., Freiberger, M., Ryder, O. A., and Wilson, A. C.  
568 (1984). Dna sequences from the quagga, an extinct member of the horse  
569 family. *Nature*.
- 570 Hudson, R. R. (2002). Generating samples under a wright–fisher neutral  
571 model of genetic variation. *Bioinformatics*, 18(2):337–338.
- 572 Jay, F., Sjödin, P., Jakobsson, M., and Blum, M. G. (2013). Anisotropic iso-  
573 lation by distance: the main orientations of human genetic differentiation.  
574 *Molecular biology and evolution*, 30(3):513–525.
- 575 Karakachoff, M., Duforet-Frebourg, N., Simonet, F., Le Scouarnec, S.,  
576 Pellen, N., Lecointe, S., Charpentier, E., Gros, F., Cauchi, S., Froguel,  
577 P., et al. (2015). Fine-scale human genetic structure in western france.  
578 *European Journal of Human Genetics*, 23(6):831–836.
- 579 Kimura, M. (1953). stepping stone model of population. *Ann. Rept. Nat.*  
580 *Inst. Genetics Japan*, pages 62–63.
- 581 Kimura, M. and Crow, J. F. (1963). The measurement of effective population  
582 number. *Evolution*, pages 279–288.
- 583 Kimura, M. and Weiss, G. H. (1964). The stepping stone model of population  
584 structure and the decrease of genetic correlation with distance. *Genetics*,  
585 49(4):561.
- 586 Loh, P.-R., Lipson, M., Patterson, N., Moorjani, P., Pickrell, J. K., Re-  
587 ich, D., and Berger, B. (2013). Inferring admixture histories of human  
588 populations using linkage disequilibrium. *Genetics*, 193(4):1233–1254.
- 589 Malécot, G. (1948). *mathématiques de l'hérédité*. Paris: Masson etCie.
- 590 Malécot, G. (1955). The decrease of relationship with distance. In *Cold*  
591 *Spring Harbor Symp. Quant. Biol*, volume 20, pages 52–53.
- 592 Maruyama, T. (1970a). Rate of decrease of genetic variability in a subdivided  
593 population. *Biometrika*, 57(2):299–311.
- 594 Maruyama, T. (1970b). Stepping stone models of finite length. *Advances in*  
595 *Applied Probability*, pages 229–258.
- 596 Maruyama, T. (1971a). Analysis of population structure: Ii. two-  
597 dimensional stepping stone models of finite length and other geographically  
598 structured populations\*. *Annals of human genetics*, 35(2):179–196.

- 599 Maruyama, T. (1971b). The rate of decrease of heterozygosity in a popula-  
600 tion occupying a circular or a linear habitat. *Genetics*, 67(3):437.
- 601 Maruyama, T. (1972). Rate of decrease of genetic variability in a two-  
602 dimensional continuous population of finite size. *Genetics*, 70(4):639–651.
- 603 McVean, G. (2009). A genealogical interpretation of principal components  
604 analysis. *PLoS Genet*, 5(10):e1000686.
- 605 Nagylaki, T. (1983). The robustness of neutral models of geographical vari-  
606 ation. *Theoretical Population Biology*, 24(3):268–294.
- 607 Nei, M. (1973). Analysis of gene diversity in subdivided populations. *Pro-  
608 ceedings of the National Academy of Sciences*, 70(12):3321–3323.
- 609 Novembre, J., Johnson, T., Bryc, K., Kutalik, Z., Boyko, A. R., Auton, A.,  
610 Indap, A., King, K. S., Bergmann, S., Nelson, M. R., et al. (2008). Genes  
611 mirror geography within europe. *Nature*, 456(7218):98–101.
- 612 Novembre, J. and Stephens, M. (2008). Interpreting principal compo-  
613 nent analyses of spatial population genetic variation. *Nature genetics*,  
614 40(5):646–649.
- 615 Pääbo, S. (1985). Molecular cloning of ancient egyptian mummy dna. *Na-  
616 ture*.
- 617 Pääbo, S., Poinar, H., Serre, D., Jaenicke-Després, V., Hebler, J., Rohland,  
618 N., Kuch, M., Krause, J., Vigilant, L., and Hofreiter, M. (2004). Genetic  
619 analyses from ancient dna. *Annu. Rev. Genet.*, 38:645–679.
- 620 Patterson, N., Price, A. L., and Reich, D. (2006). Population structure and  
621 eigenanalysis. *PLoS Genetics*.
- 622 Peter, B. M. and Slatkin, M. (2013). Detecting range expansions from ge-  
623 netic data. *Evolution*, 67(11):3274–3289.
- 624 Petkova, D., Novembre, J., and Stephens, M. (2014). Visualizing spatial  
625 population structure with estimated effective migration surfaces. *bioRxiv*,  
626 page 011809.
- 627 Pickrell, J. K. and Reich, D. (2014). Toward a new history and geography of  
628 human genes informed by ancient dna. *Trends in Genetics*, 30(9):377–389.



- 629 Ramachandran, S., Deshpande, O., Roseman, C. C., Rosenberg, N. A., Feld-  
630 man, M. W., and Cavalli-Sforza, L. L. (2005). Support from the relation-  
631 ship of genetic and geographic distance in human populations for a serial  
632 founder effect originating in africa. *Proceedings of the National Academy  
633 of Sciences of the United States of America*, 102(44):15942–15947.
- 634 Ross, S. M. et al. (1996). *Stochastic processes*, volume 2. John Wiley &  
635 Sons New York.
- 636 Rousset, F. (1997). Genetic differentiation and estimation of gene flow from  
637 f-statistics under isolation by distance. *Genetics*, 145(4):1219–1228.
- 638 Sharbel, T. F., Haubold, B., and Mitchell-Olds, T. (2000). Genetic iso-  
639 lation by distance in arabidopsis thaliana: biogeography and postglacial  
640 colonization of europe. *Molecular Ecology*, 9(12):2109–2118.
- 641 Skoglund, P., Malmström, H., Raghavan, M., Storå, J., Hall, P., Willerslev,  
642 E., Gilbert, M. T. P., Götherström, A., and Jakobsson, M. (2012). Origins  
643 and genetic legacy of neolithic farmers and hunter-gatherers in europe.  
644 *Science*, 336(6080):466–469.
- 645 Skoglund, P., Sjödin, P., Skoglund, T., Lascoux, M., and Jakobsson, M.  
646 (2014). Investigating population history using temporal genetic differen-  
647 tiation. *Molecular biology and evolution*, 31(9):2516–2527.
- 648 Slatkin, M. (1985). Gene flow in natural populations. *Annual review of  
649 ecology and systematics*, pages 393–430.
- 650 Slatkin, M. (1991). Inbreeding coefficients and coalescence times. *Genetical  
651 research*, 58(02):167–175.
- 652 Slatkin, M. (1993). Isolation by distance in equilibrium and non-equilibrium  
653 populations. *Evolution*, pages 264–279.
- 654 Teacher, A. G., Thomas, J. A., and Barnes, I. (2011). Modern and ancient  
655 red fox (*vulpes vulpes*) in europe show an unusual lack of geographical  
656 and temporal structuring, and differing responses within the carnivores  
657 to historical climatic change. *BMC evolutionary biology*, 11(1):214.
- 658 Weir, B. S. and Cockerham, C. C. (1984). Estimating f-statistics for the  
659 analysis of population structure. *evolution*, pages 1358–1370.
- 660 Weiss, G. H. and Kimura, M. (1965). A mathematical analysis of the step-  
661 ping stone model of genetic correlation. *Journal of Applied Probability*,  
662 pages 129–149.

- 663 Wilkins, J. F. and Wakeley, J. (2002). The coalescent in a continuous, finite,  
664 linear population. *Genetics*, 161(2):873–888.
- 665 Wright, S. (1940). Breeding structure of populations in relation to specia-  
666 tion. *American Naturalist*, pages 232–248.
- 667 Wright, S. (1943). Isolation by distance. *Genetics*, 28(2):114.
